# Supplementary material
Source: publisher figshare collection journal article supplement (https://acs.figshare.com/ndownloader/files/5827713)
Supplement: Supplementary file 1 [file 5827713]

## Supporting Information

Sylvia Daoud Kinzie, Bernd Thern, and Dirk Iwata-Reuyl

Mechanistic Studies of the tRNA-Modifying Enzyme QueA: A Chemical Imperative for the Use of AdoMet as a “Ribosyl” Donor

Submitted to *Organic Letters*

***In vitro* transcription of 17-mer RNA Substrate.** Template DNA for the transcription reactions was composed of two synthetic DNA oligomers: T<sub>7</sub>-Top 5'-T A A T A C G A C T C A C T A T A - 3' and T<sub>7</sub>-A s n 5'-G C G G A T T A A C A G T C C G C T A T A G T G A G T C G T A T T A - 3'. The Standard transcription reactions were run in 40 mM Tris (pH 8.1), 1 mM spermidine, 5 mM DTT, 50 µg/mL bovine serum albumin, 0.01% Triton X-100, 80 mg/mL polyethylene glycol (6000-7000 MW), 20 mM MgCl<sub>2</sub>, 4 mM NTPs, 500 nM T<sub>7</sub>-Top, 500 nM T<sub>7</sub>-Asn, and T<sub>7</sub> RNA polymerase (5 µg). Transcription reactions were typically run for 6 hours at 37 °C, followed by the addition of DNase (200 units) and incubation at 37 °C for 1 hour. The reactions were then extracted twice with an equal volume of phenol:chloroform:isoamyl alcohol (24:24:1) and once with an equal volume of chloroform. The RNA was precipitated after addition of 3 volumes of ethanol and cooling to -20 °C, collected by centrifugation for 30 minutes at 15,000 rpm (Sorvall SS-34 rotor), and after air-drying was dissolved in 3 mM citrate buffer (pH 6.3). The RNA was subjected to two additional cycles of ethanol precipitation before use, and stored in 3 mM citrate buffer (pH 6.3) at -90 °C until use.

**Tgt/QueA Reaction.** A typical reaction contained in a final volume of 500 µl 50 mM HEPES (pH 7.5), 2 mM DTT, 10 mM MgCl<sub>2</sub>, 50 mM KCl, 0.2 mM preQ<sub>1</sub>, and 20 µM RNA. Reactions were initiated with the addition of 30 µg of recombinant Tgt, and after 1 hour at 30 °C, [1'-<sup>13</sup>C]AdoMet and recombinant GST-QueA were added to final concentrations of 0.2 mM and 0.24 µg/µL (added in 3 portions over 8 hours), respectively. The reactions were terminated by precipitation of the modified RNA with three volumes of ethanol and cooling to -20 °C.

**Isolation of [<sup>13</sup>C]oQ.** The precipitated RNA from a Tgt/QueA reaction was resuspended in 10 mM ammonium acetate (pH 5.3) and digested with nuclease P1 (8 units) for 2 hours at 42 °C.

The pH was made alkaline with the addition of 1 M ammonium carbonate, and the nucleotides dephosphorylated with alkaline phosphatase (30 units, 2 hours at 37 °C). The mononucleoside solution was then passed through a Microcon-10 (Amicon) ultrafiltration unit to remove proteins and particulates. The [ $^{13}\text{C}$ ]oQ in the filtrate was then purified via HPLC using a Supelcosil LC-18S column (Supelco) with a mobile phase of 100% 100 mM ammonium acetate (pH 6.0) to 40/60 acetonitrile/water. A representative chromatogram is shown below, along with the UV spectrum of [ $^{13}\text{C}$ ]oQ. HPLC Retention times and the UV spectra of the oQ were compared with authentic material obtained from the digestion of tRNA<sup>Tyr</sup> obtained from *E. coli* MRE600, which is known to contain oQ instead of Q.

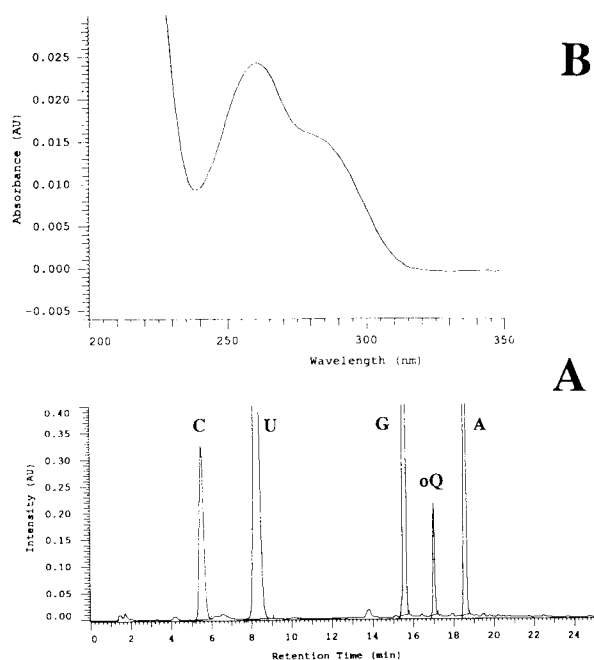

**Figure S1.** (A) Representative reverse-phase HPLC chromatogram of nucleosides generated after reaction of the RNA oligomer with recombinant Tgt and GST-QueA, nuclease digestion of

the modified RNA, and dephosphorylation of the mononucleotides. **C**, cytidine; **U**, uridine; **G**, guanosine; **oQ**, epoxyqueuosine; **A**, adenosine. HPLC was performed with an Hitachi HPLC system composed of a L7100 pump and L4500A diode array detector controlled via the D7000 Chromatography software using a Supelcosil LC-18S column with a gradient of 100% 250 mM  $\text{NH}_4\text{OAc}$  (pH 6.0) to 40%  $\text{CH}_3\text{CN}$ /60%  $\text{H}_2\text{O}$ . (B) UV spectrum of the [ $^{13}\text{C}$ ]oQ isolated.
